# Supplementary material for: Preparation and characterization of mixed-ligand cobalt(iii) complexes containing (3-aminopropyl)dimethylphosphine (pdmp). Conformation of the six-membered pdmp chelate ring
Source: Royal Society of Chemistry journal article supplement (doi:10.1039/b612025c), 2006-11-15
Supplement: b612025c.pdf [file b612025c.pdf]

**Preparation and characterization of mixed-ligand cobalt(III) complexes containing (3-aminopropyl)dimethylphosphine (pdmp). Conformation of the six-membered pdmp chelate ring**

**Takayoshi Suzuki,<sup>\*a</sup> Katsuhiro Fujiwara,<sup>b</sup> Hideo D. Takagi<sup>b</sup> and Kazuo Kashiwabara<sup>b</sup>**

<sup>a</sup> Department of Chemistry, Graduate School of Science, Osaka University, Toyonaka 560-0043, Japan.

Tel: +81-6-6850-5410; Fax: +81-6-6850-5408; E-mail: suzuki@chem.sci.osaka-u.ac.jp

<sup>b</sup> Graduate School of Science, and Research Center for Materials Science, Nagoya University, Furocho, Chikusa, Nagoya 464-8602, Japan.

**(1) Crystal structures of the dichloro complexes: *trans*(Cl,Cl)*cis*(P,P)-[CoCl<sub>2</sub>(pdmp)<sub>2</sub>]<sup>+</sup>PF<sub>6</sub><sup>-</sup>**

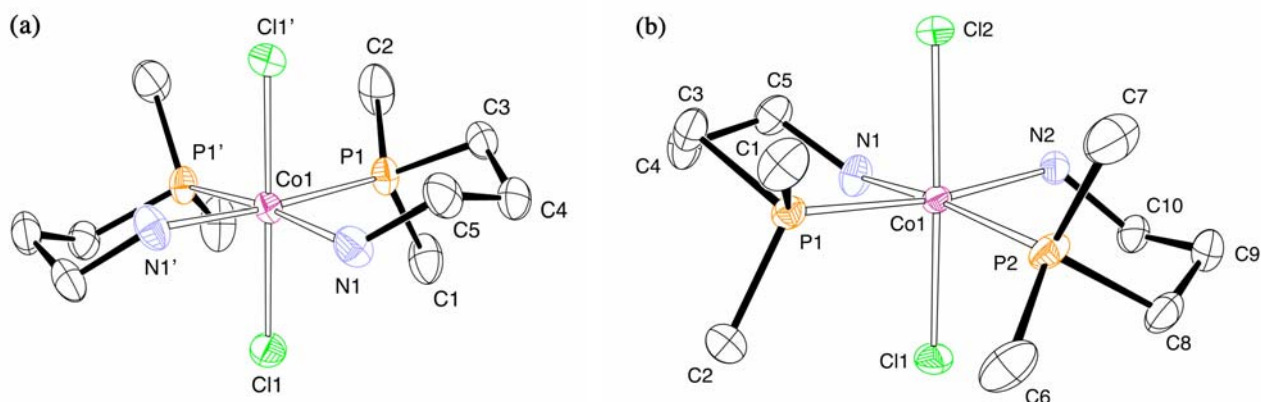

**Fig. S1** Comparison of molecular structures of *trans*(Cl,Cl)*cis*(P,P)-[CoCl<sub>2</sub>(pdmp)<sub>2</sub>]<sup>+</sup> in (a) **1**•CH<sub>3</sub>CN (30% probability level) and (b) **1** (50% probability level).

**Table S1** Comparisons of geometrical parameters (Å, °) of *trans(Cl,Cl)cis(P,P)*-[CoCl<sub>2</sub>(pdmp)<sub>2</sub>]<sup>+</sup> in **1**•CH<sub>3</sub>CN and **1**.

| <b>1</b> •CH <sub>3</sub> CN |            | <b>1</b>     |           |               |           |
|------------------------------|------------|--------------|-----------|---------------|-----------|
| Co1–Cl1                      | 2.2423(14) | Co1–Cl1      | 2.252(2)  | Co1–Cl2       | 2.246(2)  |
| Co1–P1                       | 2.2328(14) | Co1–P1       | 2.225(2)  | Co1–P2        | 2.223(2)  |
| Co1–N1                       | 2.070(4)   | Co1–N1       | 2.053(3)  | Co1–N2        | 2.049(3)  |
| Cl1–Co1–Cl1'                 | 176.67(8)  | Cl1–Co1–Cl2  | 177.73(3) |               |           |
| Cl1–Co1–P1                   | 87.57(6)   | Cl1–Co1–P1   | 93.80(10) | Cl1–Co1–P2    | 86.52(8)  |
| Cl1–Co1–P1'                  | 94.73(6)   | Cl2–Co1–P1   | 85.71(10) | Cl2–Co1–P2    | 95.74(8)  |
| Cl1–Co1–N1                   | 90.74(13)  | Cl1–Co1–N1   | 85.77(11) | Cl1–Co1–N2    | 94.05(12) |
| Cl1–Co1–N1'                  | 86.84(13)  | Cl2–Co1–N1   | 92.01(11) | Cl2–Co1–N2    | 86.32(12) |
| P1–Co1–P1'                   | 93.14(7)   | P1–Co1–P2    | 95.20(7)  |               |           |
| P1–Co1–N1                    | 89.99(13)  | P1–Co1–N1    | 89.58(9)  | P1–Co1–N2     | 171.57(7) |
| P1–Co1–N1'                   | 173.81(11) | P2–Co1–N1    | 171.18(8) | P2–Co1–N2     | 88.33(10) |
| N1–Co1–N1'                   | 87.4(2)    | N1–Co1–N2    | 87.95(12) |               |           |
| Co1–P1–C3–C4                 | 47.8(5)    | Co1–P1–C3–C4 | 51.6(3)   | Co1–P2–C8–C9  | 49.9(3)   |
| P1–C3–C4–C5                  | –66.3(5)   | P1–C3–C4–C5  | –67.0(3)  | P2–C8–C9–C10  | –62.1(3)  |
| C3–C4–C5–N1                  | 70.9(6)    | C3–C4–C5–N1  | 68.0(4)   | C8–C9–C10–N2  | 67.9(3)   |
| Co1–N1–C5–C4                 | –65.3(6)   | Co1–N1–C5–C4 | –62.8(4)  | Co1–N2–C10–C9 | –71.5(3)  |

**(2) UV-vis absorption spectra of the pdmp and the related complexes:**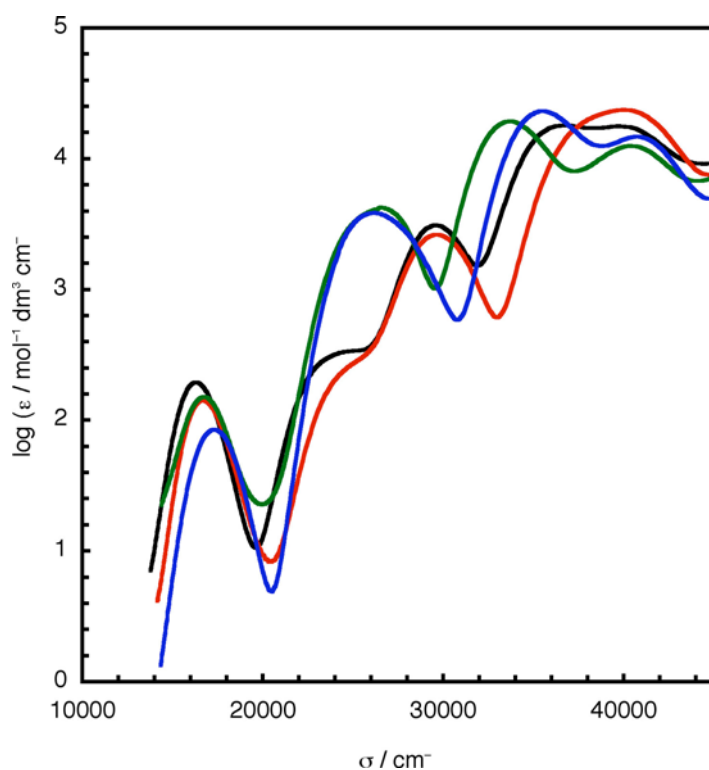

**Fig, S2 (a)** UV-vis absorption spectra of complexes **1** (black), **2** (red), **3** (green) and **4** (blue) in acetonitrile at ambient temperature.

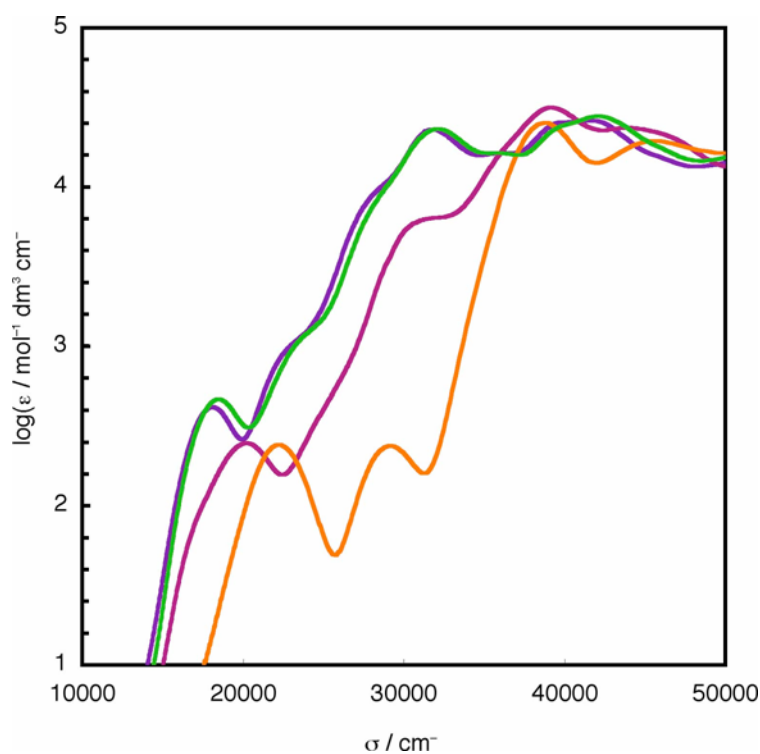

**Fig, S2 (b)** UV-vis absorption spectra of complexes **5** (orange) in water, **6** (red-purple), **9** (blue-purple) and **11** (light green) in acetonitrile at ambient temperature.

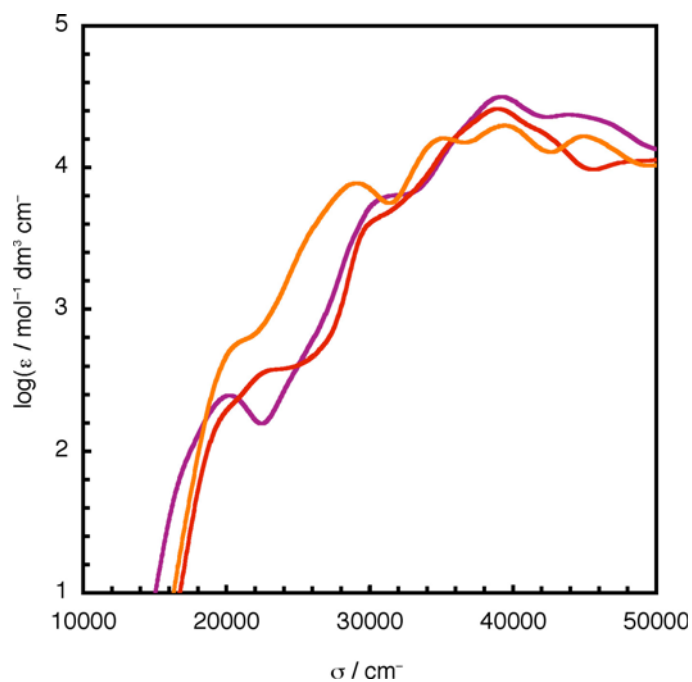

**Fig, S2 (c)** UV-vis absorption spectra of complexes **6** (red-purple), **7a** (red) and **7b** (orange) in acetonitrile at ambient temperature.

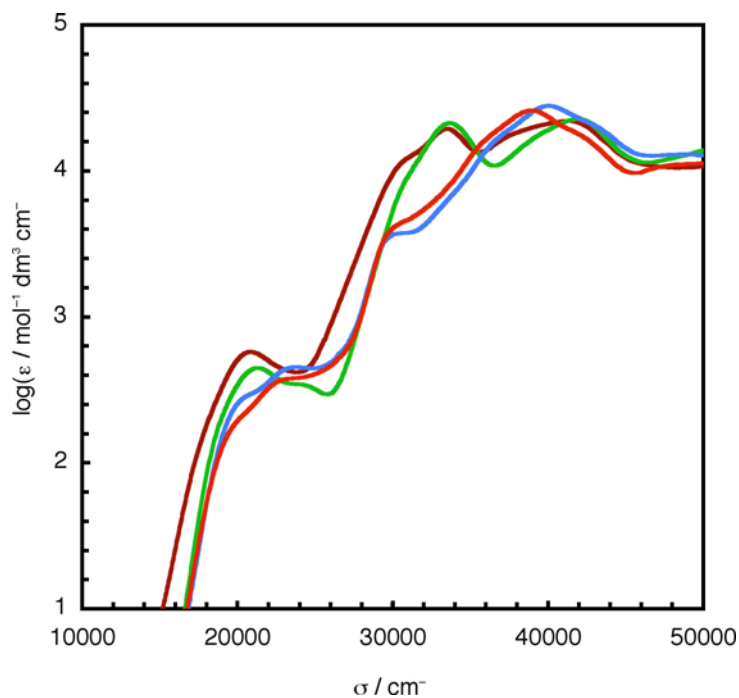

**Fig, S2 (d)** UV-vis absorption spectra of complexes **7a** (red), **8** (aqua), **10** (reddish brown) and **12** (yellow-green) in acetonitrile at ambient temperature.

### (3) DFT optimum geometry calculation

The calculations were performed using Oxford CAChe 3.2 program system. Each model conformer generated was at first refined by the MM3 calculation, and then the geometry was optimized by the DGauss DFT method. The DZVP basis sets and B88-LYP energy functional was used, and the density mixing parameter was set to be 0.1. Level shift was ignored during the calculation. The threshold of the gradient used to terminate the optimization was 0.0008 Hartree/Bohr, and the self-consistent wavefunction convergence criteria for the orbital rotation gradient and the energy were 0.0005 and 0.0000005, respectively.

**[Co(en)<sub>2</sub>(pdmp)]<sup>3+</sup>:** The DFT optimum geometry calculation was performed in the following four conformers, *trans*(*lel,chair*)-*lel•ob•chair*, *cis*(*lel,chair*)-*lel•ob•chair*, *lel<sub>2</sub>•chair* and *ob<sub>2</sub>•chair*. The relative energy difference among the conformers were: *cis*(*lel,chair*)-*lel•ob•chair*: -0.18 kJ mol<sup>-1</sup> < *trans*(*lel,chair*)-*lel•ob•chair*: 0 kJ mol<sup>-1</sup> < *lel<sub>2</sub>•chair*: 0.06 kJ mol<sup>-1</sup> < *ob<sub>2</sub>•chair*: 0.48 kJ mol<sup>-1</sup> (Fig. S3). In Table S2 the calculated geometrical parameters for *trans*(*lel,chair*)-*lel•ob•chair* conformer were compared to the actual structural parameters of complex **5** determined by X-ray analysis

**[CoCl<sub>2</sub>(pdmp)<sub>2</sub>]<sup>+</sup>:** For the dichlorobis(pdmp) complexes, several conformers for five geometrical isomers were examined by the DFT optimum geometry calculation. The energy of the most stable structure, (*C*<sub>2</sub>)-*chair<sub>2</sub>-trans*(*Cl,Cl*)-*cis*(*P,P*)- [CoCl<sub>2</sub>(pdmp)<sub>2</sub>]<sup>+</sup> that was consistent with the observed structure in the X-ray analysis of **1** (and **1**•CH<sub>3</sub>CN), was set to be zero. The results are illustrated in Fig. S4 (a)–(d). In Tables S3–S6, the calculated geometrical parameters for (*C*<sub>2</sub>)-*chair<sub>2</sub>-trans*(*Cl,Cl*)-*cis*(*P,P*), *syn-chair<sub>2</sub>-cis*(*Cl,Cl*)-*trans*(*P,N*), *trans-chair•lel-cis*(*Cl,Cl*)-*trans*(*P,N*) and *anti-chair<sub>2</sub>-cis*(*Cl,Cl*)-*trans*(*N,N*) conformers were compared to the X-ray derived structural parameters of complexes **1**, **7a**, **10'** and **7b**, respectively.

***trans*-[CoCl<sub>2</sub>(dmpp)<sub>2</sub>]<sup>+</sup>:** Five conformers of *trans*-[CoCl<sub>2</sub>(dmpp)<sub>2</sub>]<sup>+</sup> were calculated by the DFT method, and the results are collected in Fig. S5. The relative energies, that of the most stable conformer of (*D*<sub>2d</sub>)-*twist<sub>2</sub>* was set to be zero, were (*C*<sub>2i</sub>)-*chair<sub>2</sub>*: 5.70 kJ mol<sup>-1</sup>, *chair•twist*: 21.19 kJ mol<sup>-1</sup>, (*C*<sub>2v</sub>)-*chair<sub>2</sub>*: 23.63 kJ mol<sup>-1</sup>, (*C*<sub>2h</sub>)-*twist<sub>2</sub>*: 39.54 kJ mol<sup>-1</sup>. In Table S7 the calculated geometrical parameters for (*D*<sub>2d</sub>)-*twist<sub>2</sub>* conformer were compared to the X-ray derived structural parameters in complex **3**.

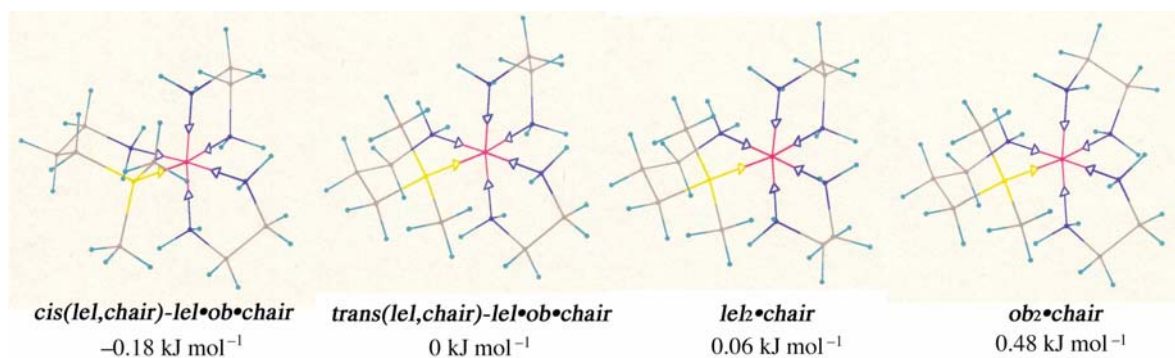

**Fig. S3** The optimized structures and the relative energies of some conformers of  $[\text{Co}(\text{en})_2(\text{pdmp})]^{3+}$ .

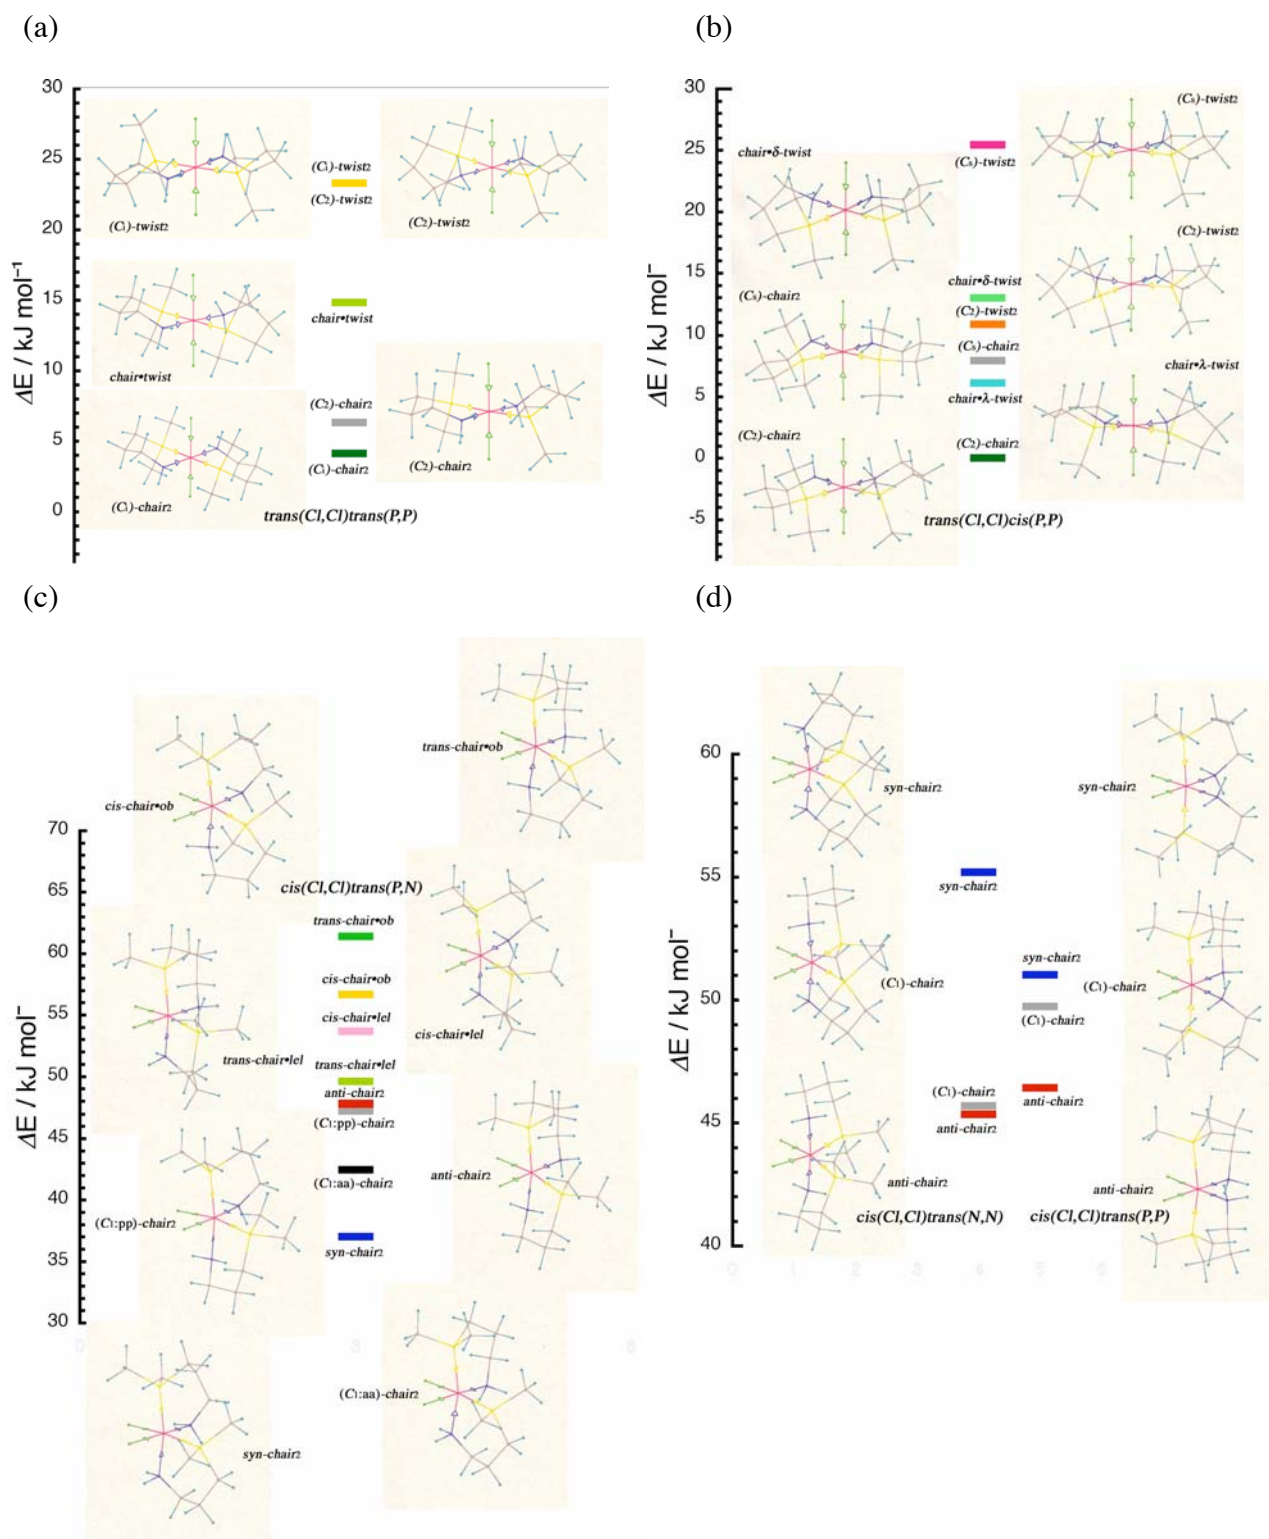

**Fig. S4** The optimized structures and the relative energies of some isomers and conformers of  $[\text{CoCl}_2(\text{pdmp})_2]^+$ .

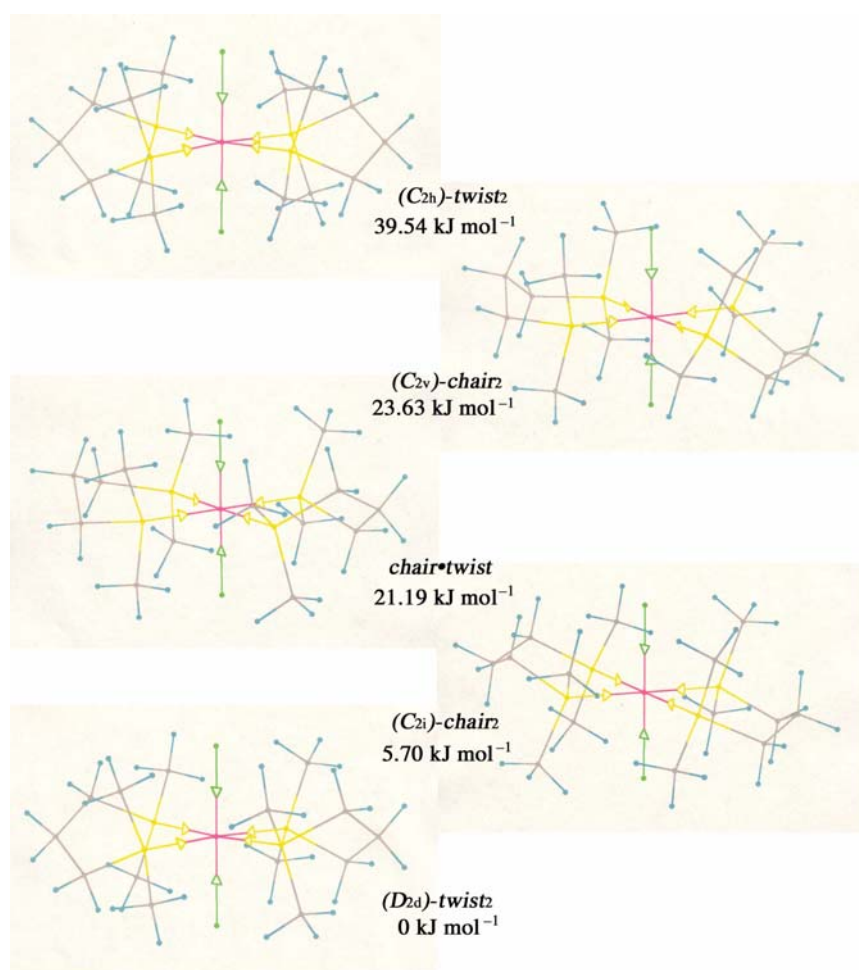

**Fig. S5** The optimized structures and the relative energies of some conformers of  $trans\text{-}[\text{CoCl}_2(\text{dmpp})_2]^+$ .

**Table S2.** Comparison of structural parameters (Å, °) of  $[\text{Co}(\text{en})_2(\text{pdmp})]^{3+}$  obtained by X-ray analysis of compound **5** with those resulted from the DFT optimum geometry calculation for the *trans*(*lel, chair*)-*lel•ob•chair* conformer.

|           | 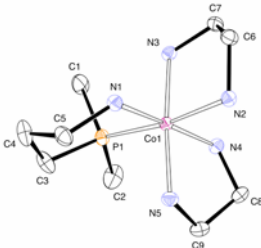 |  |
|-----------|-----------------------------------------------------------------------------------|------------------------------------------------------------------------------------|
|           | X-ray                                                                             | DFT calculation                                                                    |
| Co1–P1    | 2.2455(10)                                                                        | 2.431                                                                              |
| Co1–N1    | 1.992(2)                                                                          | 2.083                                                                              |
| Co1–N2    | 2.036(2)                                                                          | 2.167                                                                              |
| Co1–N3    | 1.975(2)                                                                          | 2.062                                                                              |
| Co1–N4    | 1.989(2)                                                                          | 2.061                                                                              |
| Co1–N5    | 1.995(2)                                                                          | 2.049                                                                              |
| P1–Co1–N1 | 89.95(9)                                                                          | 87.91                                                                              |
| N2–Co1–N3 | 83.52(9)                                                                          | 81.68                                                                              |
| N4–Co1–N5 | 83.98(10)                                                                         | 83.16                                                                              |

**Table S3.** Comparison of structural parameters (Å, °) of *trans*(*Cl, Cl*)-*cis*(*P, P*)-  $[\text{CoCl}_2(\text{pdmp})_2]^+$  obtained by X-ray analysis of compound **1** with those resulted from the DFT optimum geometry calculation for the (*C*<sub>2</sub>)-*chair*<sub>2</sub> conformer.

|           | 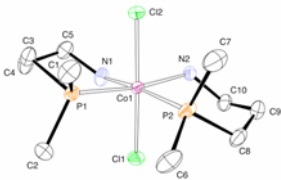 |  |
|-----------|-------------------------------------------------------------------------------------|--------------------------------------------------------------------------------------|
|           | X-ray                                                                               | DFT calculation                                                                      |
| Co1–Cl1   | 2.252(2)                                                                            | 2.303                                                                                |
| Co1–Cl2   | 2.246(2)                                                                            | 2.303                                                                                |
| Co1–P1    | 2.225(2)                                                                            | 2.319                                                                                |
| Co1–P2    | 2.223(2)                                                                            | 2.315                                                                                |
| Co1–N1    | 2.053(3)                                                                            | 2.128                                                                                |
| Co1–N2    | 2.049(3)                                                                            | 2.138                                                                                |
| P1–Co1–N1 | 89.58(9)                                                                            | 91.01                                                                                |
| P2–Co1–N2 | 88.33(10)                                                                           | 89.62                                                                                |

**Table S4.** Comparison of structural parameters (Å, °) of *syn-chair<sub>2</sub>-trans*(*P,N*)-[Co(acac)(pdmp)<sub>2</sub>]<sup>2+</sup> obtained by X-ray analysis of compound **7a** with those resulted from the DFT optimum geometry calculation for *syn-chair<sub>2</sub>-cis*(*Cl,Cl*)*trans*(*P,N*)-[CoCl<sub>2</sub>(pdmp)<sub>2</sub>]<sup>+</sup>.

|               | <div style="display: flex; justify-content: space-around; align-items: center;"> 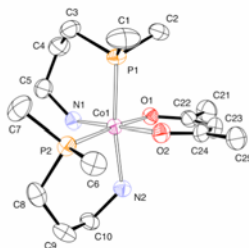  </div> |                 |
|---------------|--------------------------------------------------------------------------------------------------------------------------------------------------------------------------------------------------------------------------------------------------------------|-----------------|
|               | X-ray                                                                                                                                                                                                                                                        | DFT calculation |
| Co1–P1        | 2.2233(12), 2.2170(11)                                                                                                                                                                                                                                       | 2.293           |
| Co1–P2        | 2.2383(12), 2.2352(12)                                                                                                                                                                                                                                       | 2.329           |
| Co1–O1 (–Cl1) | 1.938(2), 1.928(2)                                                                                                                                                                                                                                           | 2.303           |
| Co1–O2 (–Cl2) | 1.901(3), 1.902(2)                                                                                                                                                                                                                                           | 2.384           |
| Co1–N1        | 1.975(3), 1.979(3)                                                                                                                                                                                                                                           | 2.076           |
| Co1–N2        | 2.060(3), 2.062(3)                                                                                                                                                                                                                                           | 2.136           |
| P1–Co1–N1     | 95.54(10), 92.95(9)                                                                                                                                                                                                                                          | 95.34           |
| P2–Co1–N2     | 89.36(9), 87.41(9)                                                                                                                                                                                                                                           | 89.93           |
| O1–Co1–O2     | 93.66(12), 93.51(11)                                                                                                                                                                                                                                         |                 |

**Table S5.** Comparison of structural parameters (Å, °) of *trans-chair•lel-trans*(*P,N*)-[Co(dtc)(pdmp)<sub>2</sub>]<sup>2+</sup> obtained by X-ray analysis of compound **10'** with those resulted from the DFT optimum geometry calculation for *trans-chair•lel-cis*(*Cl,Cl*)*trans*(*P,N*)-[CoCl<sub>2</sub>(pdmp)<sub>2</sub>]<sup>+</sup>.

|               | <div style="display: flex; justify-content: space-around; align-items: center;"> 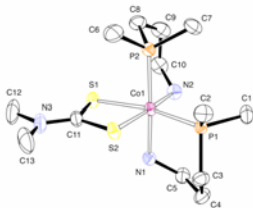  </div> |                 |
|---------------|------------------------------------------------------------------------------------------------------------------------------------------------------------------------------------------------------------------------------------------------------------------|-----------------|
|               | X-ray                                                                                                                                                                                                                                                            | DFT calculation |
| Co1–P1        | 2.2393(6)                                                                                                                                                                                                                                                        | 2.346           |
| Co1–P2        | 2.2327(7)                                                                                                                                                                                                                                                        | 2.310           |
| Co1–S1 (–Cl1) | 2.3139(8)                                                                                                                                                                                                                                                        | 2.342           |
| Co1–S2 (–Cl2) | 2.2522(7)                                                                                                                                                                                                                                                        | 2.304           |
| Co1–N1        | 2.0614(17)                                                                                                                                                                                                                                                       | 2.118           |
| Co1–N2        | 2.0337(17)                                                                                                                                                                                                                                                       | 2.085           |
| P1–Co1–N1     | 89.40(5)                                                                                                                                                                                                                                                         | 87.96           |
| P2–Co1–N2     | 88.10(6)                                                                                                                                                                                                                                                         | 90.92           |
| P1–Co1–N2     | 100.15(6)                                                                                                                                                                                                                                                        | 96.29           |

**Table S6.** Comparison of structural parameters (Å, °) of *anti-chair*<sub>2</sub>-*trans*(*N,N*)-[Co(acac)(pdmp)<sub>2</sub>]<sup>2+</sup> obtained by X-ray analysis of compound **7b** with those resulted from the DFT optimum geometry calculation for *anti-chair*<sub>2</sub>-*cis*(*Cl,Cl*)*trans*(*N,N*)-[CoCl<sub>2</sub>(pdmp)<sub>2</sub>]<sup>+</sup>.

|                        | <div style="display: flex; justify-content: space-around; align-items: center;"> 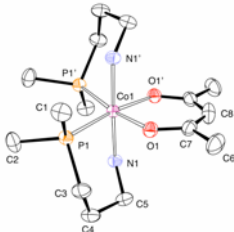  </div> |                 |
|------------------------|--------------------------------------------------------------------------------------------------------------------------------------------------------------------------------------------------------------------------------------------------------------|-----------------|
|                        | X-ray                                                                                                                                                                                                                                                        | DFT calculation |
| Co1–P1                 | 2.2508(7)                                                                                                                                                                                                                                                    | 2.331, 2.339    |
| Co1–O1 ( <i>–Cl1</i> ) | 1.9444(18)                                                                                                                                                                                                                                                   | 2.359, 2.367    |
| Co1–N1                 | 1.988(2)                                                                                                                                                                                                                                                     | 2.066, 2.062    |
| P1–Co1–N1              | 88.70(7)                                                                                                                                                                                                                                                     | 87.57, 88.51    |
| P1–Co1–P2              | 104.78(4)                                                                                                                                                                                                                                                    | 104.76          |

**Table S7.** Comparison of structural parameters (Å, °) of *trans*-[CoCl<sub>2</sub>(dmpp)<sub>2</sub>]<sup>+</sup> obtained by X-ray analysis of compound **3** with those resulted from the DFT optimum geometry calculation for (*D*<sub>2d</sub>)-*twist*<sub>2</sub>-*trans*-[CoCl<sub>2</sub>(dmpp)<sub>2</sub>]<sup>+</sup>.

|            | <div style="display: flex; justify-content: space-around; align-items: center;"> 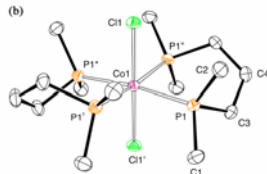  </div> |                            |
|------------|------------------------------------------------------------------------------------------------------------------------------------------------------------------------------------------------------------------------------------------------------------------|----------------------------|
|            | X-ray                                                                                                                                                                                                                                                            | DFT calculation            |
| Co1–Cl1    | 2.2555(9)                                                                                                                                                                                                                                                        | 2.317, 2.320               |
| Co1–P1     | 2.2862(7)                                                                                                                                                                                                                                                        | 2.390, 2.390, 2.394, 2.395 |
| P1–Co1–P1' | 88.99(4)                                                                                                                                                                                                                                                         | 88.04, 87.90               |
